# Supplementary material
Source: publisher figshare collection journal article supplement (https://acs.figshare.com/ndownloader/files/16254329)
Supplement: Supplementary file 1 [file 16254329]

Compound	Smiles	A375 (IC50, nM)	M14 (IC50, nM)	WM164 (IC50, nM)
10aa	O=C(C1=CNC(C2=C(C3=CC=CC=C3)NC4=C2C=CC=C4)=N1)C5=CC(OC)=C(OC)C(OC)=C5	>1000	>1000	>1000
10ab	O=C(C1=CNC(C2=CNC3=C2C(C)=CC=C3)=N1)C4=CC(OC)=C(OC)C(OC)=C4	1.8 ± 0.2	1.7 ± 0.2	3.2 ± 0.3
10ac	O=C(C1=CNC(C2=CNC3=C2C(F)=CC=C3)=N1)C4=CC(OC)=C(OC)C(OC)=C4	7.2 ± 0.7	8.2 ± 0.9	ND
10ad	O=C(C1=CNC(C2=CNC3=C2C(Br)=CC=C3)=N1)C4=CC(OC)=C(OC)C(OC)=C4	13.8 ± 1.7	10.4 ± 1.2	67.1 ±14.5
10ae	O=C(C1=CNC(C2=CNC3=C2C(OC)=CC=C3)=N1)C4=CC(OC)=C(OC)C(OC)=C4	>1000	>1000	>1000
10af	O=C(C1=CNC(C2=CNC3=C2C(OCC4=CC=CC=C4)=CC=C3)=N1)C5=CC(OC)=C(OC)C(OC)=C5	>1000	>1000	>1000
10ag	O=C(C1=CNC(C2=CNC3=C2C=C(C)C=C3)=N1)C4=CC(OC)=C(OC)C(OC)=C4	277.7 ± 36.3	177.4 ± 16.3	552.3 ± 108.3
10ah	O=C(C1=CNC(C2=CNC3=C2C=C(F)C=C3)=N1)C4=CC(OC)=C(OC)C(OC)=C4	19.2 ± 1.5	18.0 ± 1.3	80.9 ± 16.6
10ai	O=C(C1=CNC(C2=CNC3=C2C=C(Cl)C=C3)=N1)C4=CC(OC)=C(OC)C(OC)=C4	61.8 ± 9.3	64.9 ± 4.3	159.5 ± 24.1
10aj	O=C(C1=CNC(C2=CNC3=C2C=C(Br)C=C3)=N1)C4=CC(OC)=C(OC)C(OC)=C4	164.2 ± 16.7	104.3 ± 5.9	441.7 ± 110.0
10ak	O=C(C1=CNC(C2=CNC3=C2C=C(OCC4=CC=CC=C4)C=C3)=N1)C5=CC(OC)=C(OC)C(OC)=C5	>1000	>1000	>1000
10al	O=C(C1=CNC(C2=CNC3=C2C=CC(C)=C3)=N1)C4=CC(OC)=C(OC)C(OC)=C4	21.1 ± 3.9	21.7 ± 4.7	23.7 ± 6.1
10am	O=C(C1=CNC(C2=CNC3=C2C=CC(F)=C3)=N1)C4=CC(OC)=C(OC)C(OC)=C4	17.5 ± 3.0	5.8 ± 0.8	10.3 ± 1.2
10an	O=C(C1=CNC(C2=CNC3=C2C=CC(Br)=C3)=N1)C4=CC(OC)=C(OC)C(OC)=C4	67.8 ± 10.5	41.2 ± 7.5	55.4 ± 7.4
10ao	O=C(C1=CNC(C2=CNC3=C2C=CC(OCC4=CC=CC=C4)=C3)=N1)C5=CC(OC)=C(OC)C(OC)=C5	>1000	>1000	>1000
10ap	O=C(C1=CNC(C2=CNC3=C2C=CC(OC)=C3)=N1)C4=CC(OC)=C(OC)C(OC)=C4	793.4 ± 89.9	879.8 ± 88.2	>1000
10aq	O=C(C1=CNC(C2=CNC3=C2C=CC(C(OC)=O)=C3)=N1)C4=CC(OC)=C(OC)C(OC)=C4	>1000	>1000	>1000
10ar	O=C(C1=CNC(C2=CNC3=C2C=CC=C3C)=N1)C4=CC(OC)=C(OC)C(OC)=C4	13.1 ± 1.3	10.8 ± 1.0	61.3 ± 11.0
10as	O=C(C1=CNC(C2=CNC3=C2C=CC=C3OCC4=CC=CC=C4)=N1)C5=CC(OC)=C(OC)C(OC)=C5	>1000	>1000	>1000
10at	O=C(C1=CNC(C2=CNC3=C2C=CC=C3OC)=N1)C4=CC(OC)=C(OC)C(OC)=C4	38.3 ± 3.7	34.1 ± 3.5	115.4 ± 25.0
10au	O=C(C1=CNC(C2=CNC3=C2C=C(O)C=C3)=N1)C4=CC(OC)=C(OC)C(OC)=C4	>1000	>1000	>1000
10av	O=C(C1=CNC(C2=CNC3=C2C=CC(O)=C3)=N1)C4=CC(OC)=C(OC)C(OC)=C4	>1000	>1000	>1000
10bb	O=C(C1=CNC(C2=CC=CC3=C2C=CN3)=N1)C4=CC(OC)=C(OC)C(OC)=C4	3.6 ± 1.0	3.7 ± 0.8	1.6 ± 0.3
10bc	O=C(C1=CNC(C2=CC3=C(C=C2)NC=C3)=N1)C4=CC(OC)=C(OC)C(OC)=C4	8.6 ± 3.3	18.5 ± 3.7	6.1 ± 1.2
10bd	O=C(C1=CNC(C(C=C2)=CC3=C2C=CN3)=N1)C4=CC(OC)=C(OC)C(OC)=C4	8.0 ± 1.0	6.1 ± 1.1	3.8 ± 0.5
10be	O=C(C1=CNC(C2=CC=CC3=C2NC=C3)=N1)C4=CC(OC)=C(OC)C(OC)=C4	285.5 ± 78.7	240.6 ± 38.1	435.8 ± 171.3
